# Supplementary material for: Renal Handling of Galectin‐3 in the General Population, Chronic Heart Failure, and Hemodialysis
Source: PubMed Central journal article supplement — J Am Heart Assoc. 2014 Jun 27;3(5):e000962. doi: 10.1161/JAHA.114.000962 (PMC4323807; doi:10.1161/jaha.114.000962), 2014-06-27
Supplement: jah3-3-e000962-s1.pdf [file jah3-3-e000962-s1.pdf]

## Supplemental Material

Same analysis in a subset of the cases and controls according to possible confounders (age, gender, diabetes mellitus and smoking status).

**Table S1. Galectin-3 Related Parameters: Full population**

| <b>Variables</b>                                                     | <b>HF Patients<br/>(n = 101)</b> | <b>Control Subjects<br/>(n = 20)</b> | <b>P value</b> |
|----------------------------------------------------------------------|----------------------------------|--------------------------------------|----------------|
| Plasma Galectin-3, ng/mL                                             | 16.6 (14.5-19.3)                 | 9.7 (8.9-12.4)                       | <0.001         |
| Urinary Galectin-3, ng/mL                                            | 28.1 (19.7-49.5)                 | 35.1 (21.2-50.3)                     | 0.830          |
| Galectin-3 clearance, mL/min                                         | 2.3 (1.5-3.4)                    | 3.9 (2.3-6.4)                        | 0.005          |
| Fractional Galectin-3 excretion, %                                   | 2.4 (1.7-3.7)                    | 3.0 (1.9-5.5)                        | 0.018          |
| Median values with (25 <sup>th</sup> to 75 <sup>th</sup> percentile) |                                  |                                      |                |

**Table S2. Galectin-3 Related Parameters: Females excluded**

| <b>Variables</b>                                                     | <b>HF Patients<br/>(n = 94)</b> | <b>Control Subjects<br/>(n = 14)</b> | <b>P value</b> |
|----------------------------------------------------------------------|---------------------------------|--------------------------------------|----------------|
| Plasma Galectin-3, ng/mL                                             | 16.4 (14.5-19.2)                | 9.7 (8.7-12.1)                       | <0.001         |
| Urinary Galectin-3, ng/mL                                            | 29.4 (20.6-50.3)                | 39.7 (22.5-52.3)                     | 0.536          |
| Galectin-3 clearance, mL/min                                         | 2.3 (1.6-3.6)                   | 2.8 (2.0-5.7)                        | 0.021          |
| Fractional Galectin-3 excretion, %                                   | 2.4 (1.7-3.8)                   | 2.9 (1.1-4.9)                        | 0.260          |
| Median values with (25 <sup>th</sup> to 75 <sup>th</sup> percentile) |                                 |                                      |                |

**Table S3. Galectin-3 Related Parameters: DM excluded**

| <b>Variables</b>                                                     | <b>HF Patients<br/>(n = 87)</b> | <b>Control Subjects<br/>(n = 20)</b> | <b>P value</b> |
|----------------------------------------------------------------------|---------------------------------|--------------------------------------|----------------|
| Plasma Galectin-3, ng/mL                                             | 16.2 (14.4-19.0)                | 9.7 (8.9-12.4)                       | <0.001         |
| Urinary Galectin-3, ng/mL                                            | 28.1 (19.3-47.6)                | 35.1 (21.2-50.3)                     | 0.790          |
| Galectin-3 clearance, mL/min                                         | 2.3 (1.5-3.3)                   | 3.9 (2.3-6.4)                        | <0.001         |
| Fractional Galectin-3 excretion, %                                   | 2.4 (1.7-3.5)                   | 3.0 (1.9-5.5)                        | 0.013          |
| Median values with (25 <sup>th</sup> to 75 <sup>th</sup> percentile) |                                 |                                      |                |

**Table S4. Galectin-3 Related Parameters: Smokers excluded**

| <b>Variables</b>                   | <b>HF Patients</b> | <b>Control Subjects</b> | <b>P value</b> |
|------------------------------------|--------------------|-------------------------|----------------|
|                                    | <b>(n = 87)</b>    | <b>(n = 20)</b>         |                |
| Plasma Galectin-3, ng/mL           | 16.0 (14.4-19.4)   | 9.7 (8.9-12.4)          | <0.001         |
| Urinary Galectin-3, ng/mL          | 29.0 (19.0-49.0)   | 35.1 (21.2-50.3)        | 0.810          |
| Galectin-3 clearance, mL/min       | 2.3 (1.4-3.3)      | 3.9 (2.3-6.4)           | 0.002          |
| Fractional Galectin-3 excretion, % | 2.4 (1.7-3.6)      | 3.0 (1.9-5.5)           | 0.026          |

Median values with (25<sup>th</sup> to 75<sup>th</sup> percentile)

**Table S5. Galectin-3 Related Parameters: Exact age matching**

| <b>Variables</b>                   | <b>HF Patients</b> | <b>Control Subjects</b> | <b>P value</b> |
|------------------------------------|--------------------|-------------------------|----------------|
|                                    | <b>(n = 44)</b>    | <b>(n = 20)</b>         |                |
| Plasma Galectin-3, ng/mL           | 15.8 (14.0-19.5)   | 9.7 (8.9-12.4)          | <0.001         |
| Urinary Galectin-3, ng/mL          | 24.8 (19.7-42.0)   | 35.1 (21.2-50.3)        | 0.810          |
| Galectin-3 clearance, mL/min       | 2.2 (1.4-3.3)      | 3.9 (2.3-6.4)           | 0.004          |
| Fractional Galectin-3 excretion, % | 2.0 (1.5-3.0)      | 3.0 (1.9-5.5)           | 0.007          |

Median values with (25<sup>th</sup> to 75<sup>th</sup> percentile)

**Table S6. Galectin-3 Related Parameters: Age matched, DM excluded**

| <b>Variables</b>                   | <b>HF Patients</b> | <b>Control Subjects</b> | <b>P value</b> |
|------------------------------------|--------------------|-------------------------|----------------|
|                                    | <b>(n = 41)</b>    | <b>(n = 20)</b>         |                |
| Plasma Galectin-3, ng/mL           | 15.8 (13.9-19.3)   | 9.7 (8.9-12.4)          | <0.001         |
| Urinary Galectin-3, ng/mL          | 24.9 (19.8-41.6)   | 35.1 (21.2-50.3)        | 0.418          |
| Galectin-3 clearance, mL/min       | 2.3 (1.4-3.3)      | 3.9 (2.3-6.4)           | 0.005          |
| Fractional Galectin-3 excretion, % | 2.0 (1.5-3.0)      | 3.0 (1.9-5.5)           | 0.009          |

Median values with (25<sup>th</sup> to 75<sup>th</sup> percentile)

**Table S7. Galectin-3 Related Parameters: Age matched, DM and Smokers excluded**

| <b>Variables</b>                   | <b>HF Patients<br/>(n = 30)</b> | <b>Control Subjects<br/>(n = 20)</b> | <b>P value</b> |
|------------------------------------|---------------------------------|--------------------------------------|----------------|
| Plasma Galectin-3, ng/mL           | 15.7 (13.8-19.5)                | 9.7 (8.9-12.4)                       | <0.001         |
| Urinary Galectin-3, ng/mL          | 28.0 (19.9-41.7)                | 35.1 (21.2-50.3)                     | 0.616          |
| Galectin-3 clearance, mL/min       | 2.3 (1.4-3.6)                   | 3.9 (2.3-6.4)                        | 0.056          |
| Fractional Galectin-3 excretion, % | 2.1 (1.6-3.2)                   | 3.0 (1.9-5.5)                        | 0.035          |

Median values with (25<sup>th</sup> to 75<sup>th</sup> percentile)
